# Supplementary material
Source: PubMed Central journal article supplement (PMC1976586)
Supplement: plntphys_pp.107.100321_2.pdf [file plntphys_pp.107.100321_2.pdf]

1 **Supplementary Figure 1.** Clustal W alignment of amino acid sequences surrounding the  
2 substituted residue of YGL1 paralogs and bacterial chlorophyll synthase orthologs. Accession  
3 number from expasy server (<http://www.expasy.ch/>); synthase type B and C indicate  
4 bacteriochlorophyll and chlorophyll synthase, respectively. Motif only in chlorophyll synthase is  
5 underlined; the arrow indicates the Pro-198 to Ser change in the *yg11* mutant.

6

7
